# Supplementary material for: Del Paleolítico al Neolítico: en la gestión del talento emprendedor
Source: MDPI journal article supplement (doi:10.3390/microorganisms10050888), 2012-01-01
Supplement: s1 [file s1]

**Table S1.** Primer sequences and PCR conditions used in this study

| Name                           | Primers (5'-3')                                                        | Amplification conditions                                                                                                                                                                                              | Amplicon (pb) |
|--------------------------------|------------------------------------------------------------------------|-----------------------------------------------------------------------------------------------------------------------------------------------------------------------------------------------------------------------|---------------|
| $\beta$ -globin<br>(PCO3/PCO4) | Forward: ACACAACTGTGTTCACTAGC<br>Reverse: CAACTTCATCCACGTTACCC         | Initial denaturation at 95°C for 5 min followed by 40 cycles of denaturation at 95 °C for 30 s, annealing at 52°C for 30 s and primer extension at 72°C for 30 s, with a final extension at 72°C for 5 min.           | 115           |
| HPV<br>(GP5+/GP6+)             | Forward: TTTGTTACTGTGGTAGATATCAC<br>Reverse: GAAAAATAAACTGTAAATCATATTC | Initial denaturation at 95°C for 5 min, followed by 45 cycles consisting of denaturation at 95 °C for 1 min, annealing at 50°C for 2 min and extension at 72°C for 1.5 min, with a final extension for 5 min at 72°C. | 155           |
| BNRF1<br>(EBV)                 | Forward: CCTGGTCATCCTTTGCCA<br>Reverse: TGCTTCGTTATAGCCGTAGT           | Initial denaturation at 95°C for 2 min followed by 40 cycles of denaturation at 95°C for 15 s, annealing at 60°C for 15 s and primer extension at 72°C for 30 s, with a final extension at 72°C for 2 min.            | 95            |
| BARF1<br>(EBV)                 | Forward: CTTTCTTGGGTGAGCGAGTC<br>Reverse: CCAATAAGCACCTGCTCCTC         | Initial denaturation at 94°C for 5 min followed by 33 cycles of denaturation at 95°C for 45 s, annealing at 56°C for 40 s and extension at 72°C for 45 s, with a final extension for 5 min at 72°C.                   | 115           |
| E6 small<br>(HPV)              | Forward: CTGCAAGCAACAGTTACTGCGA<br>Reverse: TCACACACTGCATATGGATTCCC    |                                                                                                                                                                                                                       |               |
| $\beta$ -actin                 | Forward: CCACACAGGGGAGGTGATAG<br>Reverse: GGGCACGAAGGCTCATT            |                                                                                                                                                                                                                       |               |
