# Supplementary material for: Del Paleolítico al Neolítico: en la gestión del talento emprendedor
Source: MDPI journal article supplement (doi:10.3390/microorganisms10050888), 2012-01-01
Supplement: s1 [file s1]

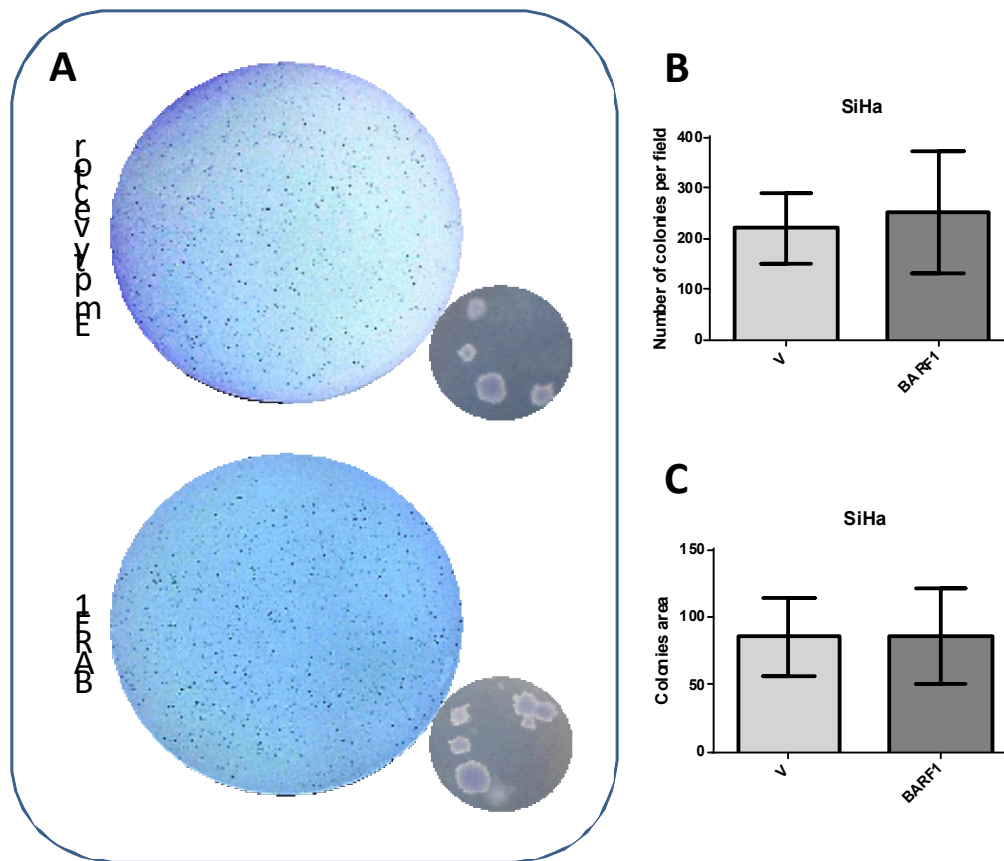

**Figure S1.** Anchorage-independent growth in BARF1-transfected SiHa cells. (A) Representative images of cell colonies formation. No significant differences were evidenced between SiHa cells transfected with empty vector or BARF1 when the number of colonies per field (B) or colonies area (C). Results correspond to three independent experiments.
