# Supplementary material for: Del Paleolítico al Neolítico: en la gestión del talento emprendedor
Source: MDPI journal article supplement (doi:10.3390/microorganisms10050888), 2012-01-01
Supplement: s1 [file s1]

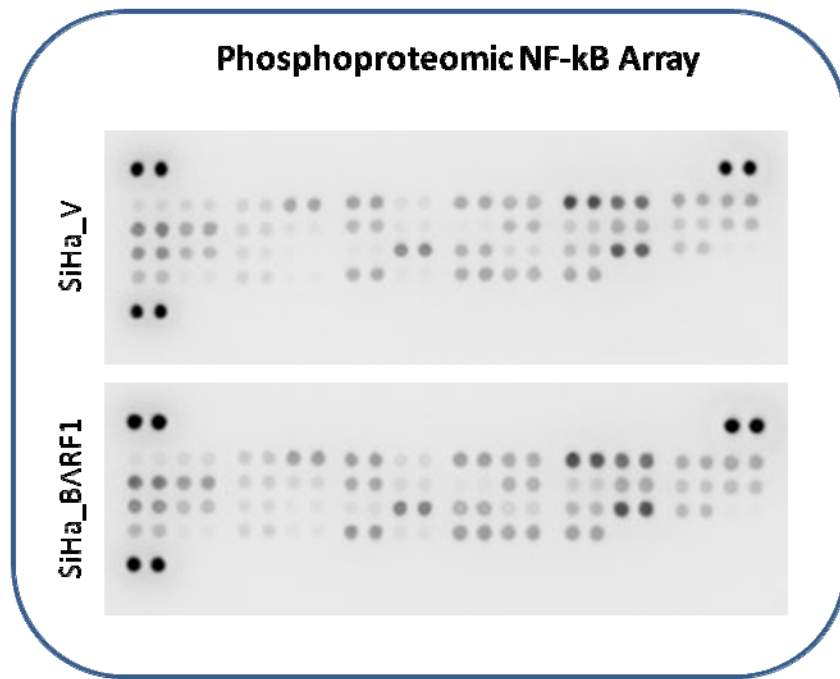

**Figure S2.** Protein array for NF- $\kappa$ B signaling pathway in BARF1-transfected SiHa cells (membranes). Conditions: SiHa cells transfected with empty vector (upper) or BARF1 (lower).
